# Supplementary material for: The Dichotomy of Mn–H Bond Cleavage and Kinetic Hydricity of Tricarbonyl Manganese Hydride Complexes
Source: MDPI journal article supplement (doi:10.3390/molecules28083368), 2023-04-11
Supplement: s1 [file s1]

# **The Dichotomy of Mn–H Bond Cleavage and Kinetic Hydricity of Tricarbonyl Manganese Hydride Complexes**

Elena Osipova<sup>1</sup>, Sergey Kovalenko<sup>1</sup>, Ekaterina Gulyaeva<sup>1,2</sup>, Nikolay Kireev<sup>1</sup>, Alexander Pavlov<sup>1</sup>, Oleg Filippov<sup>1</sup>, Anastasia Danshina<sup>1,3</sup>, Dmitry Valyaev<sup>2\*</sup>, Yves Canac<sup>2</sup>, Elena Shubina<sup>1\*</sup>, Natalia Belkova<sup>1\*</sup>

1 A.N. Nesmeyanov Institute of Organoelement Compounds, Russian Academy of Sciences (INEOS RAS), 28, Vavilova Str., 119334 Moscow, Russia; aosipova92@gmail.com (E.S.O.); kovalenko2000as@gmail.com (S.A.K.); elenor.kagami@gmail.com (E.S.G.); koly-100@mail.ru (N.V.K.); alex90pavlov@mail.ru (A.A.P.);

h-bond@ineos.ac.ru (O.A.F.); danshina.aa@phystech.edu (A.A.D.); shu@ineos.ac.ru (E.S.S.)

2 LCC-CNRS, Université de Toulouse, CNRS, 205 Route de Narbonne, 31077 Toulouse, CEDEX 4, France; yves.canac@lcc-toulouse.fr

3 Center of National Technological Initiative, Bauman Moscow State Technical University, 2nd Baumanskaya Str., 5, 105005 Moscow, Russia

4 Moscow Institute of Physics and Technology, Institutskiy per., 9, 141700 Dolgoprudny, Russia

\* Correspondence: dmitry.valyaev@lcc-toulouse.fr (D.A.V.); nataliabelk@ineos.ac.ru (N.V.B.)

## **Electronic Supplementary Information**

## Table of contents

|                                                                                                                                                                                                                                                                                                       |           |
|-------------------------------------------------------------------------------------------------------------------------------------------------------------------------------------------------------------------------------------------------------------------------------------------------------|-----------|
| Figure S1. IR spectra of complex 1 ( $c=0.003\text{M}$ ) and after HMPA (1-10 equiv.) ( <i>left</i> ) and pyridine (1, 10, 50, 100 equiv.) ( <i>right</i> ) adding. 190K, $l = 0.1\text{ cm}$ , methylcyclohexane. ....                                                                               | 2         |
| Figure S2. IR spectra of complex 3 ( $c=0.003\text{M}$ ) and after HMPA (40 and 70 equiv.) adding. 190K, $l = 0,05\text{ cm}$ , toluene. ....                                                                                                                                                         | 2         |
| Figure S3. Time evolution of IR spectra for $\nu_{\text{CO}}$ of complex 1 after addition of DBU (1.1 equiv.) during 1.2 h. $c(1) = 0.003\text{ M}$ , 230 K, $l = 0.1\text{ cm}$ , methylcyclohexane. IR spectrum of 1 alone (light blue) is shown for comparison. ....                               | 2         |
| <b>Thermodynamic data for proton transfer between 1 and DBU from IR study. ....</b>                                                                                                                                                                                                                   | <b>3</b>  |
| <b>Determination of kinetic parameters of proton transfer between 1 and DBU from IR study. ....</b>                                                                                                                                                                                                   | <b>4</b>  |
| Figure S4. IR spectra of complex 1 ( $c = 0.003\text{ M}$ ) and after $[\text{Bu}_4\text{N}]^+[\text{4-NO}_2\text{C}_6\text{H}_4\text{O}]^-$ addition (1 equiv.). 298 K, $l = 0.1\text{ cm}$ , MeCN. ....                                                                                             | 4         |
| Figure S5. IR spectra of complex 2 ( $c = 0.0144\text{ M}$ ; blue line) and 2 after KHMDS addition (2 equiv.; red line). 298 K, $l = 0.1\text{ cm}$ , THF. ....                                                                                                                                       | 5         |
| Figure S6. $^{31}\text{P}\{^1\text{H}\}$ NMR spectra (162.0 MHz) of complex 3 and its reaction with KHMDS (1:5) in THF- $d_8$ at 243 K ( <i>left</i> ) and in $\text{CD}_3\text{CN}$ at 263 K ( <i>right</i> ).....                                                                                   | 5         |
| Figure S7. IR spectra of complex 4 ( $c = 0.0033\text{ M}$ ) and its mixture with $\text{B}(\text{C}_6\text{F}_5)_3$ ( $c = 0.0037\text{ M}$ ). BuCl, 160-290K, $l = 0.05\text{ cm}$ .....                                                                                                            | 5         |
| Figure S8. Proposed reaction pathway between hydride complex 4 and $\text{BAr}_3$ . Coordinated solvent molecules to cationic species are omitted. ....                                                                                                                                               | 6         |
| Table S1. $^{31}\text{P}\{^1\text{H}\}$ NMR chemical shifts for complexes 4a and 4b in different media. ....                                                                                                                                                                                          | 6         |
| Figure S9. Top: IR spectra of 1 ( $c = 0.005\text{ M}$ ) and its mixture with $\text{B}(\text{C}_6\text{F}_5)_3$ (10 equiv). Toluene, $l = 0,05\text{ cm}$ , 190-290K (step 10K). Bottom: temperature dependence of intensity for $\nu_{\text{CO}}$ bands of 1 and $1\cdots\text{LA}$ and $1^+$ ..... | 7         |
| Figure S10. $^1\text{H}$ ( <i>left</i> ) and $^{31}\text{P}\{^1\text{H}\}$ ( <i>right</i> ) NMR spectra of 1 ( $c = 0.01\text{M}$ ; bottom) and its mixture with $\text{B}(\text{C}_6\text{F}_5)_3$ (10 equiv.). Toluene- $d_8$ , 200-290 K. ....                                                     | 7         |
| Figure S11. IR spectra of complex 2 ( $c = 0.003\text{ M}$ ) and its mixture with $\text{B}(\text{C}_6\text{F}_5)_3$ ( $c = 0.003\text{ M}$ ). $\text{CH}_2\text{Cl}_2$ , 180-290K, $l = 0.05\text{ cm}$ .....                                                                                        | 8         |
| <b>Kinetic study of the hydrogen abstraction from complexes 1 – 4 to Lewis acid .....</b>                                                                                                                                                                                                             | <b>8</b>  |
| Figure S12. Plot for the determination of effective rate constant ( $k_{\text{eff}}$ ) of 4 with $\text{B}(\text{C}_6\text{F}_5)_3$ in $n\text{BuCl}$ at 170 K.....                                                                                                                                   | 8         |
| Figure S13. Plot $-\ln(k_{\text{eff}} \cdot h/k_b \cdot T)$ vs $1/T$ for the reaction of 4 with $\text{B}(\text{C}_6\text{F}_5)_3$ in $n\text{BuCl}$ (160 - 200 K).....                                                                                                                               | 8         |
| Table S2. Crystal data and structure refinement parameters for $[(\text{P-NHC})\text{Mn}(\text{CO})_3(\text{MeCN})][\text{BF}_4]$ ( $4^{\text{MeCN}}$ ) and $[(\text{PPh}_3)_2\text{Mn}(\text{CO})_3(\text{MeCN})][\text{BF}_4]$ ( $2^{\text{MeCN}}$ ). ....                                          | 9         |
| <b>NMR spectroscopic characterization of Mn(I) cationic and anionic complexes (Figure S14-S26).....</b>                                                                                                                                                                                               | <b>10</b> |

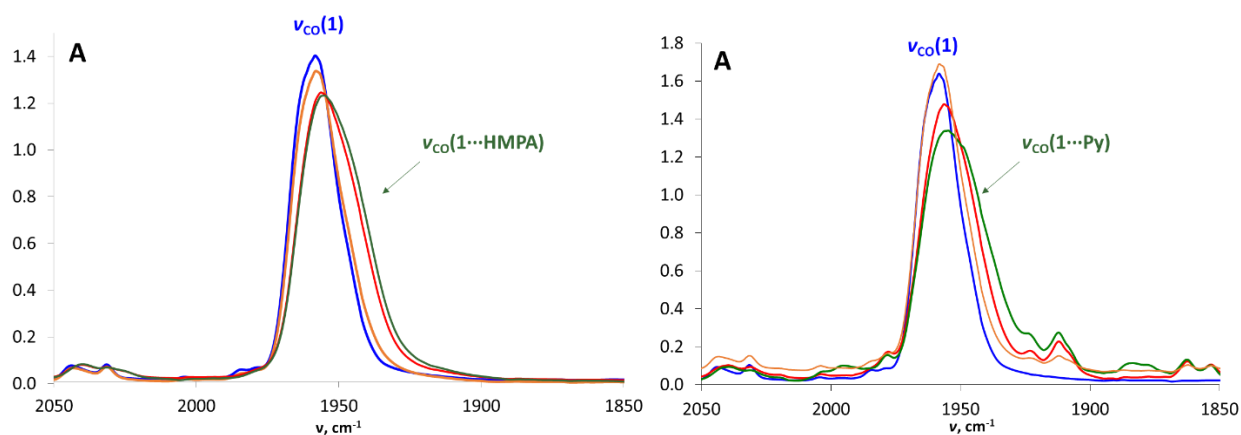

**Figure S1.** IR spectra of complex **1** ( $c=0.003\text{M}$ ) and after HMPA (1-10 equiv.) (*left*) and pyridine (1, 10, 50, 100 equiv.) (*right*) adding. 190K,  $l = 0.1\text{ cm}$ , methylcyclohexane.

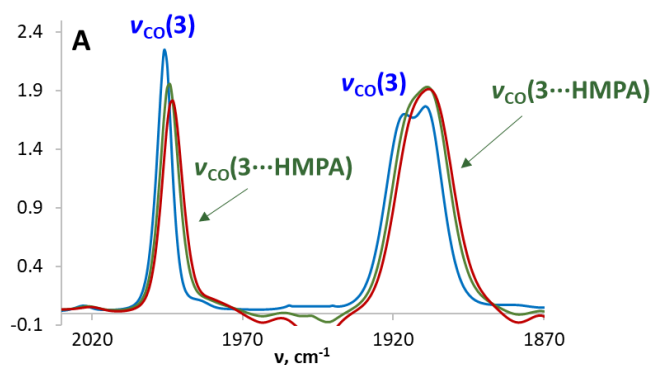

**Figure S2.** IR spectra of complex **3** ( $c=0.003\text{M}$ ) and after HMPA (40 and 70 equiv.) adding. 190K,  $l = 0.05\text{ cm}$ , toluene.

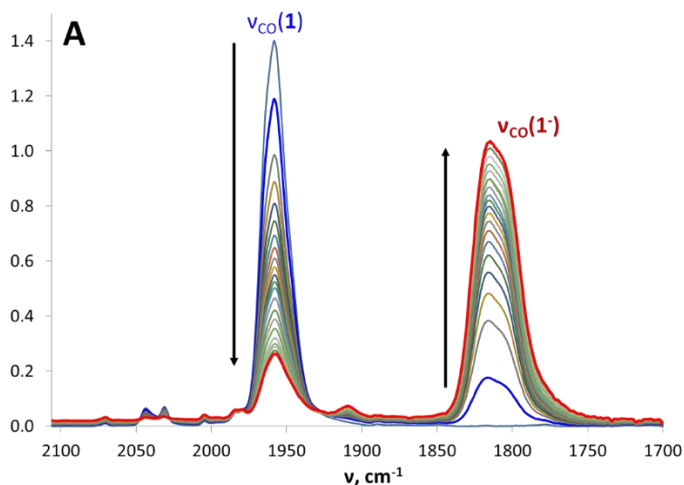

**Figure S3.** Time evolution of IR spectra for  $\nu_{\text{CO}}$  of complex **1** after addition of DBU (1.1 equiv.) during 1.2 h.  $c(\mathbf{1}) = 0.003\text{ M}$ , 230 K,  $l = 0.1\text{ cm}$ , methylcyclohexane. IR spectrum of **1** alone (light blue) is shown for comparison.

### Thermodynamic data for proton transfer between 1 and DBU from IR study.

For the reaction of  $[\text{P}(\text{OPh})_3]_2\text{Mn}(\text{CO})_3\text{H}$  (**1**) and 1,8-diazabicyclo[5.4.0]undec-7-ene (DBU) in MCH experimental equilibrium constants were obtained at 230 K, 240 K, 250 K and thermodynamic parameters ( $\Delta H^\circ$ ,  $\Delta S^\circ$ ,  $\Delta G^\circ_{298\text{K}}$ ) of proton transfer were obtained by Van't-Hoff method.

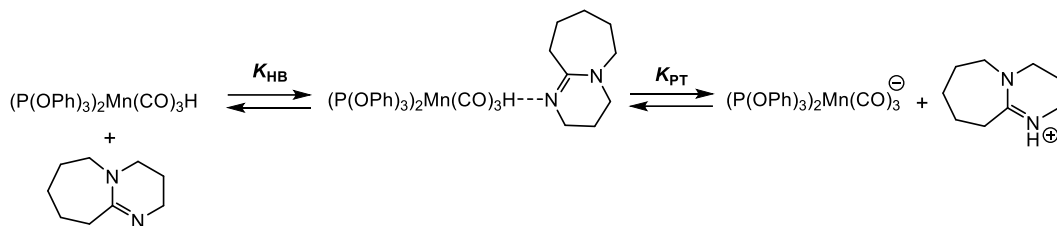

$$K_{exp} = K_{HB} \cdot K_{PT} = \frac{[1]^- [\text{DBUH}]^+}{[1][\text{DBU}]}$$

$$\Delta G^\circ = \Delta H^\circ - T\Delta S^\circ$$

$$-\frac{\Delta H^\circ}{T} + \Delta S^\circ = R \ln K_{exp}$$

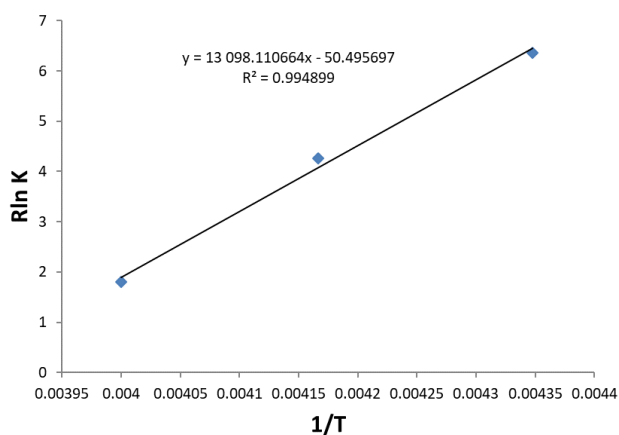

| T, K | 1/T      | $K_{exp}$ | $R \ln K_{exp}$ | Thermodynamic parameters                  |          |
|------|----------|-----------|-----------------|-------------------------------------------|----------|
| 250  | 0.004    | 2.47      | 1.80            | $\Delta H^\circ$ , kcal/mol               | 13.1±0.9 |
| 240  | 0.004167 | 8.54      | 4.27            | $\Delta S^\circ$ , cal/(mol·K)            | 50±4     |
| 230  | 0.004348 | 24.46     | 6.36            | $\Delta G^\circ_{298\text{K}}$ , kcal/mol | 1.9±0.2  |

### Determination of kinetic parameters of proton transfer between **1** and DBU from IR study.

The observed rate constants ( $k_{\text{obs}}$ ) of proton transfer from the complex  $[\text{P(OPh)}_3]_2\text{Mn}(\text{CO})_3\text{H}$  (**1**) to DBU were obtained at 190 K, 210 K and 230 K by IR monitoring ( $\nu_{\text{CO}}$ (**1**) decrease). By use of Eyring equation, the activation parameters ( $\Delta H^\ddagger$ ,  $\Delta S^\ddagger$ ,  $\Delta G^\ddagger_{298\text{K}}$ ) were determined.

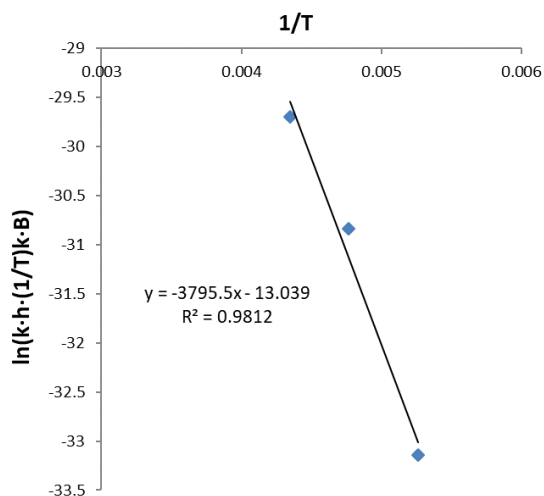

| T, K | 1/T      | k <sub>obs</sub> | Ln(k <sup>*</sup> h <sup>*</sup> (1/T)/k <sub>B</sub> ) | Activation parameters                        |          |
|------|----------|------------------|---------------------------------------------------------|----------------------------------------------|----------|
| 190  | 0.005263 | 0.016            | -33.14                                                  | $\Delta H^\ddagger$ , kcal/mol               | 7.5±0.5  |
| 210  | 0.004762 | 0.177            | -30.84                                                  | $\Delta S^\ddagger$ , cal/(mol·K)            | 26±2     |
| 230  | 0.004348 | 0.609            | -29.69                                                  | $\Delta G^\ddagger_{298\text{K}}$ , kcal/mol | 15.3±0.2 |

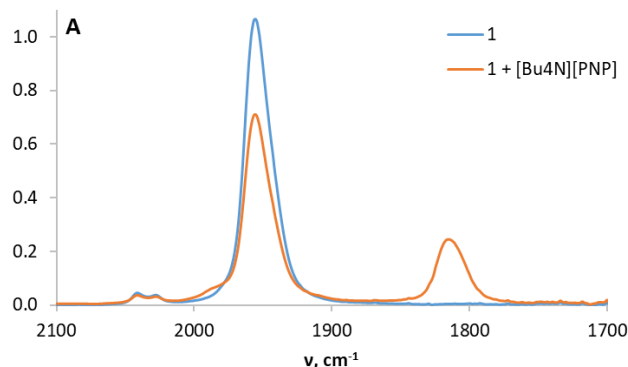

**Figure S4.** IR spectra of complex **1** ( $c = 0.003$  M) and after  $[\text{Bu}_4\text{N}]^+[\text{4-NO}_2\text{C}_6\text{H}_4\text{O}]^-$  addition (1 equiv.). 298 K,  $l = 0.1$  cm, MeCN.

$\text{p}K_{\text{a}}$  value was calculated with following equation:

$$-\text{p}K_{\text{eq}} = \text{p}K_{\text{a}}(\text{BH}^+) - \text{p}K_{\text{a}}(\text{MH}) \quad [1];$$

$K_{\text{eq}} = 0.25$  was obtained from the spectral data (Figure S4);  $\text{p}K_{\text{a}}(\text{BH}^+) = 20.7$  in MeCN [2].

<sup>1</sup> R. T. Edidin, J. M. Sullivan and J. R. Norton, *J. Am. Chem. Soc.*, **1987**, *109*, 3945-3953.

<sup>2</sup> F. Eckert, I. Leito, I. Kaljurand, A. Kütt, A. Klamt and M. Diedenhofen, *J. Comput. Chem.*, **2009**, *30*, 799-810.

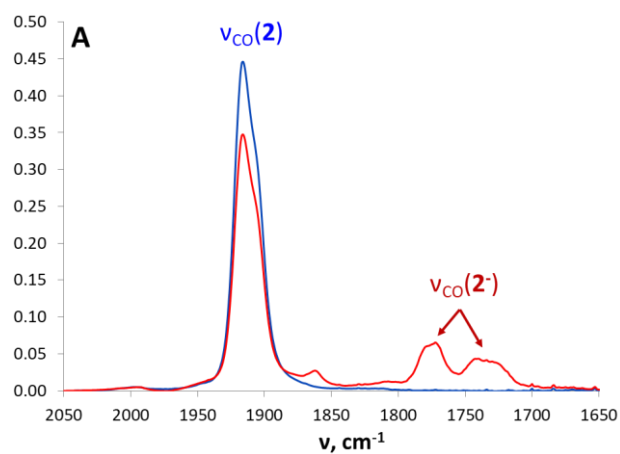

**Figure S5.** IR spectra of complex **2** ( $c = 0.0144$  M; blue line) and **2** after KHMDS addition (2 equiv.; red line). 298 K,  $l = 0.1$  cm, THF.

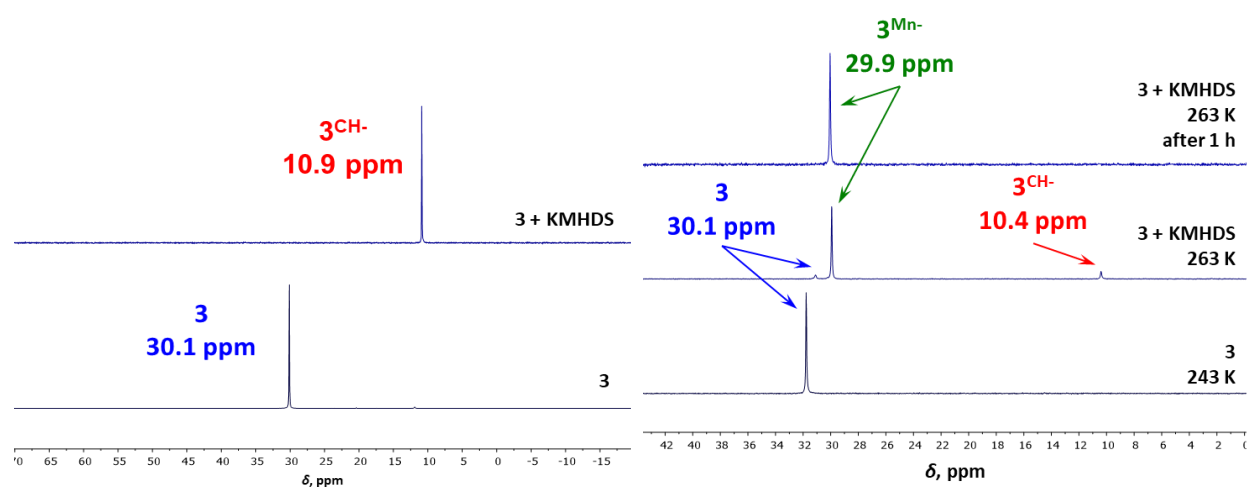

**Figure S6.**  $^{31}\text{P}\{^1\text{H}\}$  NMR spectra (162.0 MHz) of complex **3** and its reaction with KHMDS (1:5) in THF- $d_8$  at 243 K (left) and in  $\text{CD}_3\text{CN}$  at 263 K (right).

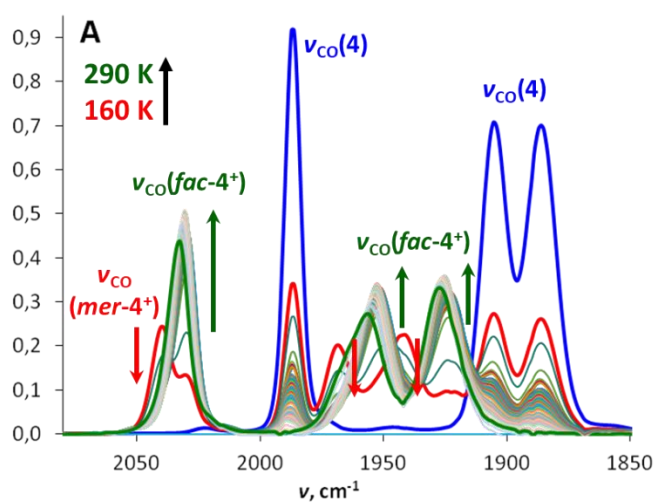

**Figure S7.** IR spectra of complex **4** ( $c = 0.0033$  M) and its mixture with  $\text{B}(\text{C}_6\text{F}_5)_3$  ( $c = 0.0037$  M). BuCl, 160–290 K,  $l = 0.05$  cm.

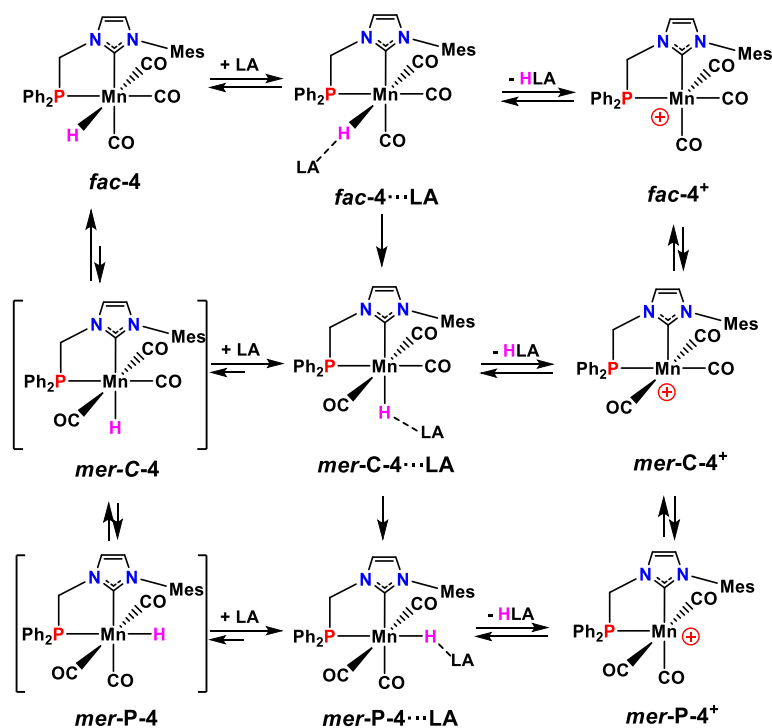

**Figure S8.** Proposed reaction pathway between hydride complex **4** and  $\text{BAR}_3$ . Coordinated solvent molecules to cationic species are omitted.

**Table S1.**  $^{31}\text{P}\{^1\text{H}\}$  NMR chemical shifts for complexes **4a** and **4b** in different media.

| Solvent                         | $\delta_{\text{P}}$ ( <b>4a</b> ) | $\delta_{\text{P}}$ ( <b>4b</b> ) |
|---------------------------------|-----------------------------------|-----------------------------------|
| Toluene                         | 74.1                              | 71.1                              |
| BuCl                            | 76.1                              | 71.5                              |
| $\text{C}_6\text{H}_5\text{Cl}$ | 77.7                              | 71.1                              |
| $\text{CD}_2\text{Cl}_2$        | 78.1                              | 71.1                              |
| MeCN                            | 77.5                              | -                                 |

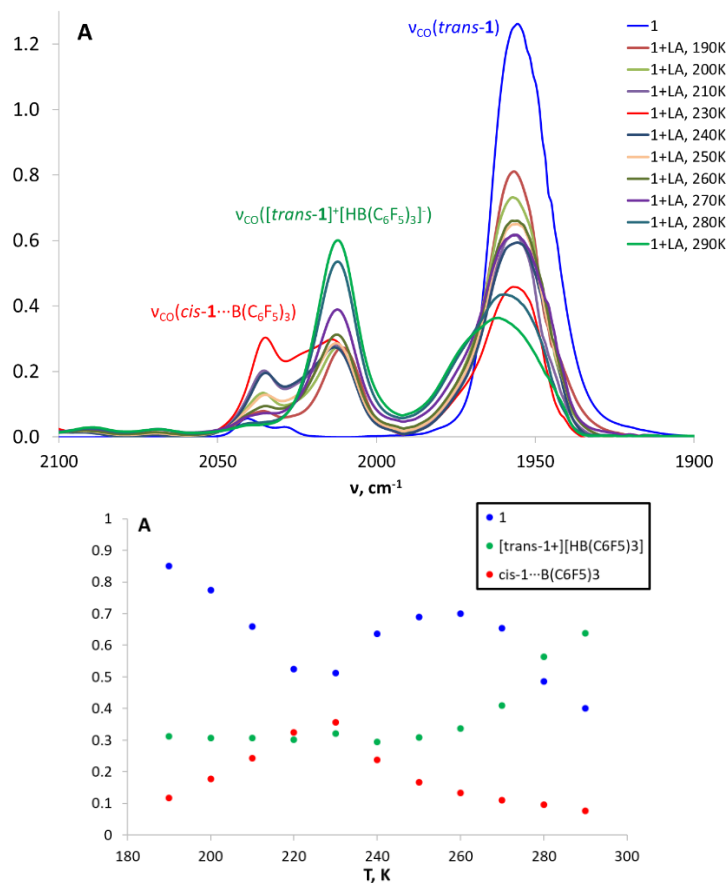

**Figure S9.** Top: IR spectra of **1** ( $c = 0.005$  M) and its mixture with  $\text{B}(\text{C}_6\text{F}_5)_3$  (10 equiv). Toluene,  $l = 0.05$  cm, 190-290K (step 10K). Bottom: temperature dependence of intensity for  $\nu_{\text{CO}}$  bands of **1** and **1** $\cdots$ LA and **1** $^+$ .

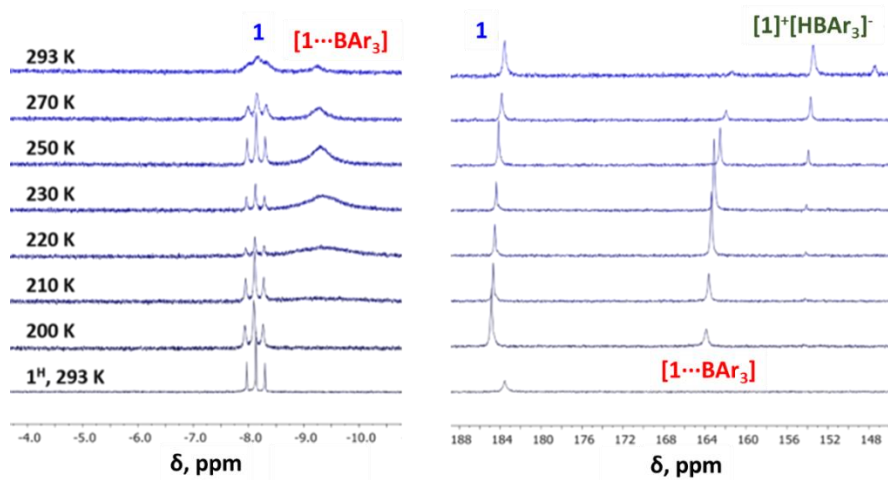

**Figure S10.**  $^1\text{H}$  (left) and  $^{31}\text{P}\{^1\text{H}\}$  (right) NMR spectra of **1** ( $c = 0.01\text{M}$ ; bottom) and its mixture with  $\text{B}(\text{C}_6\text{F}_5)_3$  (10 equiv.). Toluene- $d_8$ , 200-290 K.



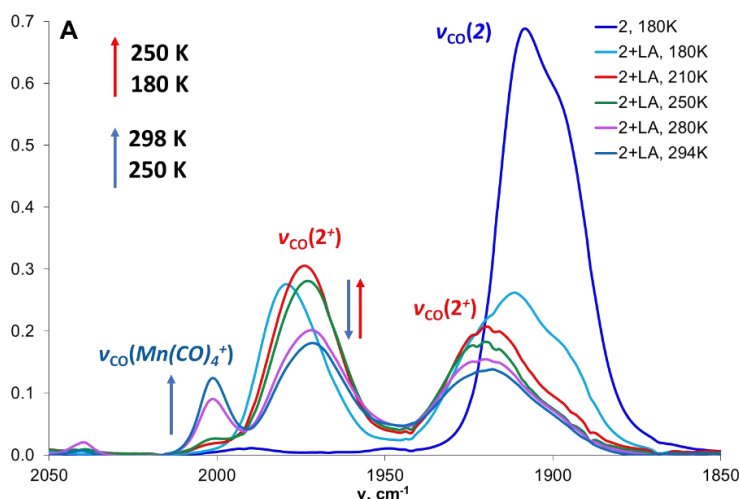

**Figure S11.** IR spectra of complex **2** ( $c = 0.003$  M) and its mixture with  $B(C_6F_5)_3$  ( $c = 0.003$  M).  $CH_2Cl_2$ , 180-290K,  $l = 0.05$  cm.

### Kinetic study of the hydrogen abstraction from complexes **1** – **4** to Lewis acid

For the hydride abstraction reaction from the complexes **1** – **4** to  $B(C_6F_5)_3$  current concentrations of the components were calculated from the absorptions obtained by IR monitoring ( $\nu_{CO}$  of the initial hydride decrease) at the temperature range (160 – 200 K). The effective rate constants ( $k_{eff}$ ) were obtained by second-order law for reaction type  $A + B \rightarrow C + B$ :

$$k = \frac{1}{t(a_0 - b_0)} \ln \frac{b_0(a_0 - a)}{a_0(b_0 - b)}$$

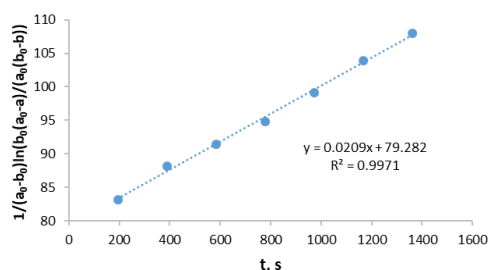

**Figure S12.** Plot for the determination of effective rate constant ( $k_{eff}$ ) of **4** with  $B(C_6F_5)_3$  in  $nBuCl$  at 170 K.

By use of Eyring equation, the activation parameters ( $\Delta H^\ddagger$ ,  $\Delta S^\ddagger$ ,  $\Delta G^\ddagger_{298K}$ ) were determined at 160 – 200 K temperature range:

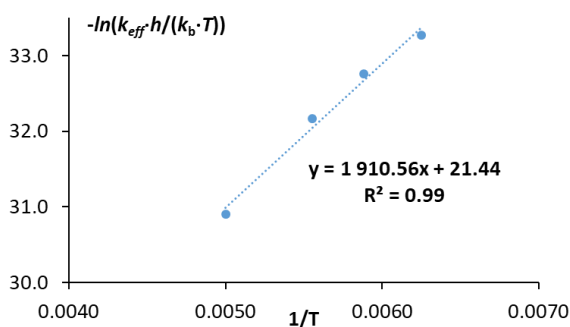

**Figure S13.** Plot  $-\ln(k_{eff} \cdot h / (k_b \cdot T))$  vs  $1/T$  for the reaction of **4** with  $B(C_6F_5)_3$  in  $nBuCl$  (160 - 200 K).

**Table S2.** Crystal data and structure refinement parameters for [(P-NHC)Mn(CO)<sub>3</sub>(MeCN)][BF<sub>4</sub>] (**4**<sup>MeCN</sup>) and [(PPh<sub>3</sub>)<sub>2</sub>Mn(CO)<sub>3</sub>(MeCN)][BF<sub>4</sub>] (**2**<sup>MeCN</sup>).

| Complex                                                    | [(P-NHC)Mn(CO) <sub>3</sub> (MeCN)][BF <sub>4</sub> ]<br><b>4</b> <sup>MeCN</sup> | [(PPh <sub>3</sub> ) <sub>2</sub> Mn(CO) <sub>3</sub> (MeCN)][BF <sub>4</sub> ]<br><b>2</b> <sup>MeCN</sup> |
|------------------------------------------------------------|-----------------------------------------------------------------------------------|-------------------------------------------------------------------------------------------------------------|
| Empirical formula                                          | C <sub>30</sub> H <sub>28</sub> BF <sub>4</sub> MnN <sub>3</sub> O <sub>3</sub> P | C <sub>42</sub> H <sub>35</sub> BCl <sub>2</sub> F <sub>4</sub> MnNO <sub>3</sub> P <sub>2</sub>            |
| Formula weight                                             | 651.27                                                                            | 876.30                                                                                                      |
| T, K                                                       | 100                                                                               | 100                                                                                                         |
| Crystal system                                             | Monoclinic                                                                        | Monoclinic                                                                                                  |
| Space group                                                | P-1                                                                               | P2 <sub>1</sub> /c                                                                                          |
| Z                                                          | 4                                                                                 | 4                                                                                                           |
| a, Å                                                       | 12.8975(3)                                                                        | 11.802(3)                                                                                                   |
| b, Å                                                       | 15.9475(3)                                                                        | 25.753(8)                                                                                                   |
| c, Å                                                       | 16.7390(4)                                                                        | 13.846(3)                                                                                                   |
| α, °                                                       | 73.6000(10)                                                                       | 90                                                                                                          |
| β, °                                                       | 89.9020(10)                                                                       | 107.127(8)                                                                                                  |
| γ, °                                                       | 66.2240(10)                                                                       | 90                                                                                                          |
| V, Å <sup>3</sup>                                          | 2997.78(12)                                                                       | 4021.9(19)                                                                                                  |
| D <sub>calc</sub> (g cm <sup>-3</sup> )                    | 1.443                                                                             | 1.447                                                                                                       |
| μ, cm <sup>-1</sup>                                        | 5.55                                                                              | 6                                                                                                           |
| F(000)                                                     | 1336                                                                              | 1792                                                                                                        |
| 2θ <sub>max</sub> , °                                      | 58                                                                                | 60                                                                                                          |
| Reflections measured                                       | 40707                                                                             | 43067                                                                                                       |
| Independent reflections                                    | 15881                                                                             | 11717                                                                                                       |
| Observed reflections [I > 2σ(I)]                           | 9234                                                                              | 8607                                                                                                        |
| Parameters                                                 | 805                                                                               | 506                                                                                                         |
| R1                                                         | 0.0693                                                                            | 0.0528                                                                                                      |
| wR2                                                        | 0.1876                                                                            | 0.1238                                                                                                      |
| GOOF                                                       | 1.031                                                                             | 1.089                                                                                                       |
| Δρ <sub>max</sub> / Δρ <sub>min</sub> (e Å <sup>-3</sup> ) | 1.451/-0.580                                                                      | 0.597/-0.781                                                                                                |

## NMR spectroscopic characterization of Mn(I) cationic and anionic complexes

**1, mer,trans-[(P(OPh)<sub>3</sub>)<sub>2</sub>Mn(CO)<sub>3</sub>H] in CD<sub>3</sub>CN:**

<sup>1</sup>H NMR (400.1 MHz, 293 K, CD<sub>3</sub>CN): δ 7.34 (t, <sup>3</sup>J<sub>HH</sub> = 7.8 Hz, 12H, CH<sub>Ar</sub>), 7.20 (t, <sup>3</sup>J<sub>HH</sub> = 7.3 Hz, 6H, CH<sub>Ar</sub>), 7.12 (d, <sup>3</sup>J<sub>HH</sub> = 8.0 Hz, 12H, CH<sub>Ar</sub>), -8.60 (t, <sup>2</sup>J<sub>PH</sub> = 49.2 Hz, 1H, Mn-H).

<sup>31</sup>P{<sup>1</sup>H} NMR (162.0 MHz, 293 K, CD<sub>3</sub>CN): δ 183.3 (s)

**1, mer,trans-[(P(OPh)<sub>3</sub>)<sub>2</sub>Mn(CO)<sub>3</sub>H] in toluene-d<sub>8</sub>:**

<sup>1</sup>H NMR (400.1 MHz, 293 K, toluene-d<sub>8</sub>): δ 7.17 (d, <sup>3</sup>J<sub>HH</sub> = 8.0 Hz, 12H, CH<sub>Ar</sub>), 6.97 (t, <sup>3</sup>J<sub>HH</sub> = 7.7 Hz, 12H, CH<sub>Ar</sub>), 6.83 (t, <sup>3</sup>J<sub>HH</sub> = 7.4 Hz, 6H, CH<sub>Ar</sub>), -8.23 (t, <sup>2</sup>J<sub>PH</sub> = 49.8 Hz, 1H, Mn-H).

<sup>31</sup>P{<sup>1</sup>H} NMR (162.0 MHz, 293 K, toluene-d<sub>8</sub>): δ 183.4 (s)

**1<sup>-</sup>, [(P(OPh)<sub>3</sub>)<sub>2</sub>Mn(CO)<sub>3</sub>][HDBU] in CD<sub>3</sub>CN:**

<sup>1</sup>H NMR (400.1 MHz, 293 K, CD<sub>3</sub>CN): δ 7.73-7.39 (m, 30H, CH<sub>Ar</sub>)

<sup>31</sup>P{<sup>1</sup>H} NMR (162.0 MHz, 293 K, CD<sub>3</sub>CN): δ 206.5 (s)

**1<sup>+</sup>, [(P(OPh)<sub>3</sub>)<sub>2</sub>Mn(CO)<sub>3</sub>][HB(C<sub>6</sub>F<sub>5</sub>)<sub>3</sub>] in toluene-d<sub>8</sub>:**

<sup>1</sup>H NMR (400.1 MHz, 293 K, toluene-d<sub>8</sub>): δ 6.80-6.94 (m, 30H, CH<sub>Ar</sub>)

<sup>31</sup>P{<sup>1</sup>H} NMR (162.0 MHz, 293 K, toluene-d<sub>8</sub>): δ 153.5 (s)

**2, mer,trans-[(PPh<sub>3</sub>)<sub>2</sub>Mn(CO)<sub>3</sub>H] in CD<sub>2</sub>Cl<sub>2</sub>:**

<sup>1</sup>H NMR (400.1 MHz, 293 K, CD<sub>2</sub>Cl<sub>2</sub>): δ 7.54 (m, 12H, o-CH<sub>Ar</sub>), 7.42 (br t, 18H, m- and p-CH<sub>Ar</sub>), -7.38 (t, <sup>2</sup>J<sub>HP</sub> = 27.4 Hz, 1H, Mn-H).

<sup>31</sup>P{<sup>1</sup>H} NMR (162.0 MHz, 293 K, CD<sub>2</sub>Cl<sub>2</sub>): δ 80.5 (s).

**2<sup>+</sup>, [(PPh<sub>3</sub>)<sub>2</sub>Mn(CO)<sub>3</sub>][HB(C<sub>6</sub>F<sub>5</sub>)<sub>3</sub>]:**

<sup>1</sup>H NMR (400.1 MHz, 293 K, CD<sub>2</sub>Cl<sub>2</sub>): δ 7.55 – 7.42 (m, 30H, CH<sub>Ar</sub>).

<sup>31</sup>P{<sup>1</sup>H} NMR (162.0 MHz, 293 K, CD<sub>2</sub>Cl<sub>2</sub>): δ 61.8 (br s).

**3, fac-[(dppm)Mn(CO)<sub>3</sub>H] in THF-d<sub>8</sub>:**

<sup>1</sup>H NMR (400.1 MHz, 243 K, THF-d<sub>8</sub>): δ 7.70 (br s, 4H, CH<sub>Ar</sub>), 7.63 (br s, 4H, CH<sub>Ar</sub>), 7.42 (br s, 12H, CH<sub>Ar</sub>), 4.42 (dtd, <sup>2</sup>J<sub>HH</sub> = 15.5 Hz, <sup>2</sup>J<sub>PH</sub> = 9.5 Hz, <sup>4</sup>J<sub>HH</sub> = 5.5 Hz, 1H, PCH<sub>2</sub>P), 4.07 (dt, <sup>2</sup>J<sub>HH</sub> = 15.4 Hz, <sup>2</sup>J<sub>PH</sub> = 11.3 Hz, 1H, PCH<sub>2</sub>P), -5.53 (td, <sup>2</sup>J<sub>PH</sub> = 44.0 Hz, <sup>4</sup>J<sub>HH</sub> = 5.5 Hz, 1H, Mn-H).

<sup>31</sup>P{<sup>1</sup>H} NMR (162.0 MHz, 243 K, THF-d<sub>8</sub>): δ 30.1 (s).

<sup>13</sup>C{<sup>1</sup>H} NMR (100.6 MHz, 243 K, THF-d<sub>8</sub>): δ 225.9 (t, <sup>2</sup>J<sub>CP</sub> = 7.0 Hz, Mn-CO), 222.7 (t, <sup>2</sup>J<sub>CP</sub> = 13.2 Hz, Mn-CO), 138.8 (vt, J<sub>PC</sub> = 24.4 Hz, C<sub>ipso</sub> PPh<sub>2</sub>), 136.6 (vt, J<sub>PC</sub> = 16.0 Hz, C<sub>ipso</sub> PPh<sub>2</sub>), 132.8–132.7 (m, CH<sub>Ar</sub>), 131.2 (d, J<sub>PC</sub> = 5.4 Hz, CH<sub>Ar</sub>), 129.5 (vdt, J<sub>PC</sub> = 10.7, 5.0 Hz, CH<sub>Ar</sub>), 48.0 (t, <sup>1</sup>J<sub>CP</sub> = 22.4 Hz, PCH<sub>2</sub>P).

**3<sup>CH-</sup>, fac-[(CH<sup>-</sup>-dppm)Mn(CO)<sub>3</sub>H] in THF-d<sub>8</sub>:**

<sup>1</sup>H NMR (400.1 MHz, 243 K, THF-d<sub>8</sub>): δ 7.74 (br s, 4H, CH<sub>Ar</sub>), 7.67 (br s, 4H, CH<sub>Ar</sub>), 7.69–7.65 (m, 12H, CH<sub>Ar</sub>), 1.95 (t, <sup>2</sup>J<sub>PH</sub> = 5.0 Hz, 1H, PCH<sup>-</sup>P), -5.54 (t, <sup>2</sup>J<sub>PH</sub> = 44.0 Hz, 1H, Mn-H).

<sup>31</sup>P{<sup>1</sup>H} NMR (162.0 MHz, 243 K, THF-d<sub>8</sub>): δ 10.9 (s).

<sup>13</sup>C{<sup>1</sup>H} NMR (100.6 MHz, 243 K, THF-d<sub>8</sub>): δ 231.8 (t, <sup>2</sup>J<sub>CP</sub> = 7.1 Hz, Mn-CO), 225.0 (t, <sup>2</sup>J<sub>CP</sub> = 14.7 Hz, Mn-CO), 150.0 (vt, J<sub>PC</sub> = 20.9 Hz, C<sub>ipso</sub> PPh<sub>2</sub>), 149.0 (vt, J<sub>PC</sub> = 18.8 Hz, C<sub>ipso</sub> PPh<sub>2</sub>), 132.1 (vt, J<sub>PC</sub> = 4.9 Hz, CH<sub>Ar</sub>), 131.7 (vt, J<sub>PC</sub> = 5.1 Hz, CH<sub>Ar</sub>), 127.6–127.5 (m, CH<sub>Ar</sub>), 127.1 (s, CH<sub>Ar</sub>), 20.8 (t, <sup>1</sup>J<sub>CP</sub> = 51.4 Hz, PCH<sup>-</sup>P).

**3, fac-[(dppm)Mn(CO)<sub>3</sub>H] in CD<sub>3</sub>CN:**

<sup>1</sup>H NMR (400.1 MHz, 243 K, CD<sub>3</sub>CN): δ 7.66–7.58 (m, 8H, CH<sub>Ar</sub>), δ 7.44–7.40 (br s, 12H, CH<sub>Ar</sub>), 4.61 (dtd, <sup>2</sup>J<sub>HH</sub> = 15.6 Hz, <sup>2</sup>J<sub>PH</sub> = 11.2 Hz, <sup>4</sup>J<sub>HH</sub> = 5.6 Hz, 1H, PCH<sub>2</sub>P), 3.99 (dt, <sup>2</sup>J<sub>HH</sub> = 15.6 Hz, <sup>2</sup>J<sub>PH</sub> = 11.5 Hz, 1H, PCH<sub>2</sub>P), -5.09 (td, <sup>2</sup>J<sub>PH</sub> = 43.4 Hz, <sup>4</sup>J<sub>HH</sub> = 5.7 Hz, 1H, Mn-H).

<sup>31</sup>P{<sup>1</sup>H} NMR (162.0 MHz, 243 K, CD<sub>3</sub>CN): δ 31.8 (s).

<sup>13</sup>C{<sup>1</sup>H} NMR (100.6 MHz, 243 K, CD<sub>3</sub>CN): δ 225.5 (t, <sup>2</sup>J<sub>CP</sub> = 7.0 Hz, Mn-CO), 222.8 (t, <sup>2</sup>J<sub>CP</sub> = 15.2 Hz, Mn-CO), 137.9 (vt, J<sub>PC</sub> = 24.6 Hz, C<sub>ipso</sub> PPh<sub>2</sub>), 135.0 (vt, J<sub>PC</sub> = 16.7 Hz, C<sub>ipso</sub> PPh<sub>2</sub>), 132.3 (vt, J<sub>PC</sub> = 5.8 Hz, CH<sub>Ar</sub>), 132.0 (vt, J<sub>PC</sub> = 5.6 Hz, CH<sub>Ar</sub>), 131.2 (d, J<sub>PC</sub> = 6.3 Hz, CH<sub>Ar</sub>), 129.6 (vdt, J<sub>PC</sub> = 10.5, 4.9 Hz, CH<sub>Ar</sub>), 48.0 (t, <sup>1</sup>J<sub>CP</sub> = 23.0 Hz, PCH<sub>2</sub>P).

**3<sup>Mn-</sup>**, *fac*-[(dppm)Mn(CO)<sub>3</sub>](K) in CD<sub>3</sub>CN:

<sup>1</sup>H NMR (400.1 MHz, 293 K, THF-*d*<sub>8</sub>): δ 7.64–7.59 (m, 8H, CH<sub>Ar</sub>), 7.30–7.21 (m, 12H, CH<sub>Ar</sub>).

<sup>31</sup>P{<sup>1</sup>H} NMR (162.0 MHz, 243 K, THF-*d*<sub>8</sub>): δ 29.9 (s).

<sup>13</sup>C{<sup>1</sup>H} NMR (100.6 MHz, 243 K, THF-*d*<sub>8</sub>): δ 245.7 (t, <sup>2</sup>J<sub>CP</sub> = 10.4 Hz, Mn–CO), 173.2 (s, C<sub>ipso</sub> PPh<sub>2</sub>), 144.6 (vt, J<sub>PC</sub> = 12.9 Hz, C<sub>ipso</sub> PPh<sub>2</sub>), 131.7 (vt, J<sub>PC</sub> = 5.9 Hz, CH<sub>Ar</sub>), 128.7 (s, CH<sub>Ar</sub>), 128.4 (vt, J<sub>PC</sub> = 4.3 Hz, CH<sub>Ar</sub>), 45.3 (t, <sup>1</sup>J<sub>CP</sub> = 22.1 Hz, PCH<sub>2</sub>P).

**4**, *fac*-[(P-NHC)Mn(CO)<sub>3</sub>H]:

<sup>1</sup>H NMR (300.1 MHz, 293 K, CD<sub>2</sub>Cl<sub>2</sub>): δ 7.75 (m, 2H, CH<sub>Ph</sub>), 7.56 (m, 2H, CH<sub>Ph</sub>), 7.26 (s, 1H, CH<sub>Im</sub>), 7.45 (m, 6H, CH<sub>Ph</sub>), 7.01 (s, 1H, CH<sub>Im</sub>), 6.99 (s, 1H, CH<sub>Mes</sub>), 6.87 (s, 1H, CH<sub>Mes</sub>), 4.86 (dd, <sup>2</sup>J<sub>HH</sub> = 13.2 Hz, <sup>2</sup>J<sub>PH</sub> = 7.3 Hz, 1H, PCH<sub>2</sub>), 4.45 (dd, <sup>2</sup>J<sub>HH</sub> = 13.2 Hz, <sup>2</sup>J<sub>PH</sub> = 3.6 Hz, 1H, PCH<sub>2</sub>), 2.35 (s, 3H, CH<sub>3Mes</sub>), 2.04 (s, 3H, CH<sub>3Mes</sub>), 1.99 (s, 3H, CH<sub>3Mes</sub>), –7.33 (d, <sup>2</sup>J<sub>PH</sub> = 53.4 Hz, Mn–H);

<sup>31</sup>P{<sup>1</sup>H} NMR (162.0 MHz, 293 K, CD<sub>2</sub>Cl<sub>2</sub>): δ 95.8 (s).

**4<sup>MeCN</sup>**, *fac*-[(P-NHC)Mn(CO)<sub>3</sub>(MeCN)]<sup>+</sup>[BF<sub>4</sub>]<sup>–</sup>:

<sup>1</sup>H NMR (300.1 MHz, 293 K, CD<sub>2</sub>Cl<sub>2</sub>): 7.93 (s, 1H, CH<sub>Ph</sub>), 7.64–7.56 (m, 9H, CH<sub>Ph</sub> + 1H, CH<sub>Im</sub>), 7.20 (s, 1H, CH<sub>Im</sub>), 7.06 (s, 1H, CH<sub>Mes</sub>), 7.05 (s, 1H, CH<sub>Mes</sub>), 5.50 (dd, <sup>2</sup>J<sub>HH</sub> = 14.5, <sup>2</sup>J<sub>PH</sub> = 6.8 Hz, 1H, PCH<sub>2</sub>), 5.00 (dd, <sup>2</sup>J<sub>HH</sub> = 15.0, <sup>2</sup>J<sub>PH</sub> = 5.3 Hz, 1H, PCH<sub>2</sub>), 2.36 (s, 3H, CH<sub>3Mes</sub>), 1.99 (s, 3H, CH<sub>3CN</sub>–Mn), 1.93 (s, 3H, CH<sub>3Mes</sub>), 1.69 (s, 3H, CH<sub>3Mes</sub>).

<sup>31</sup>P{<sup>1</sup>H} NMR (162.0 MHz, 293 K, CD<sub>2</sub>Cl<sub>2</sub>): δ 77.5 (s).

**4a**, *fac*-[(P-NHC)Mn(CO)<sub>3</sub>(CD<sub>2</sub>Cl<sub>2</sub>)]<sup>+</sup>[HB(C<sub>6</sub>F<sub>5</sub>)<sub>3</sub>]<sup>–</sup>:

<sup>1</sup>H NMR (300.1 MHz, 293 K, CD<sub>2</sub>Cl<sub>2</sub>): δ 7.66 (s, 1H, CH<sub>Ph</sub>), 7.51 (m, 2H, CH<sub>Ph</sub> + CH<sub>Im</sub>), 7.39–7.43 (m, 3H, CH<sub>Ph</sub>), 7.23 (2H, CH<sub>Ph</sub>), 7.17 (2H, CH<sub>Ph</sub>), 7.14 (s, 1H, CH<sub>Im</sub>), (7.05 (s, 1H, CH<sub>Mes</sub>), 7.02 (s, 1H, CH<sub>Mes</sub>), 5.07 (dd, <sup>2</sup>J<sub>HH</sub> = 14.0, <sup>2</sup>J<sub>PH</sub> = 5.1 Hz, 1H, PCH<sub>2</sub>), 4.94 (dd, <sup>2</sup>J<sub>HH</sub> = 14.1, <sup>2</sup>J<sub>PH</sub> = 6.6 Hz, 1H, PCH<sub>2</sub>), 2.37 (s, 3H, CH<sub>3Mes</sub>), 1.97 (s, 3H, CH<sub>3Mes</sub>), 1.79 (s, 3H, CH<sub>3Mes</sub>).

<sup>31</sup>P{<sup>1</sup>H} NMR (162.0 MHz, 293 K, CD<sub>2</sub>Cl<sub>2</sub>): δ 78.1 (s).

**4b**, *fac*-[(P-NHC)Mn(CO)<sub>3</sub>]<sup>+</sup>[HB(C<sub>6</sub>F<sub>5</sub>)<sub>3</sub>]<sup>–</sup>:

<sup>1</sup>H NMR (300.1 MHz, 293 K, CD<sub>2</sub>Cl<sub>2</sub>): δ 7.87–7.81 (m, 2H, CH<sub>Ph</sub>), 7.51 (m, 3H, CH<sub>Ph</sub> + CH<sub>Im</sub>), 7.36 (3H, CH<sub>Ph</sub>), 7.25 (2H, CH<sub>Ph</sub>), 7.15 (1H, CH<sub>Ph</sub>), 7.02 (s, 1H, CH<sub>Im</sub>), 6.98 (s, 1H, CH<sub>Mes</sub>), 6.94 (s, 1H, CH<sub>Mes</sub>), 5.48 (vt, <sup>2</sup>J<sub>HH</sub> = 14.4 Hz, <sup>2</sup>J<sub>PH</sub> = 13.7 Hz, 1H, PCH<sub>2</sub>), 4.99 (d, <sup>2</sup>J<sub>HH</sub> = 14.4 Hz, 1H, PCH<sub>2</sub>), 2.30 (s, 3H, CH<sub>3Mes</sub>), 1.92 (s, 3H, CH<sub>3Mes</sub>), 1.76 (s, 3H, CH<sub>3Mes</sub>).

<sup>31</sup>P{<sup>1</sup>H} NMR (162.0 MHz, 293 K, CD<sub>2</sub>Cl<sub>2</sub>): δ 71.1 (s).

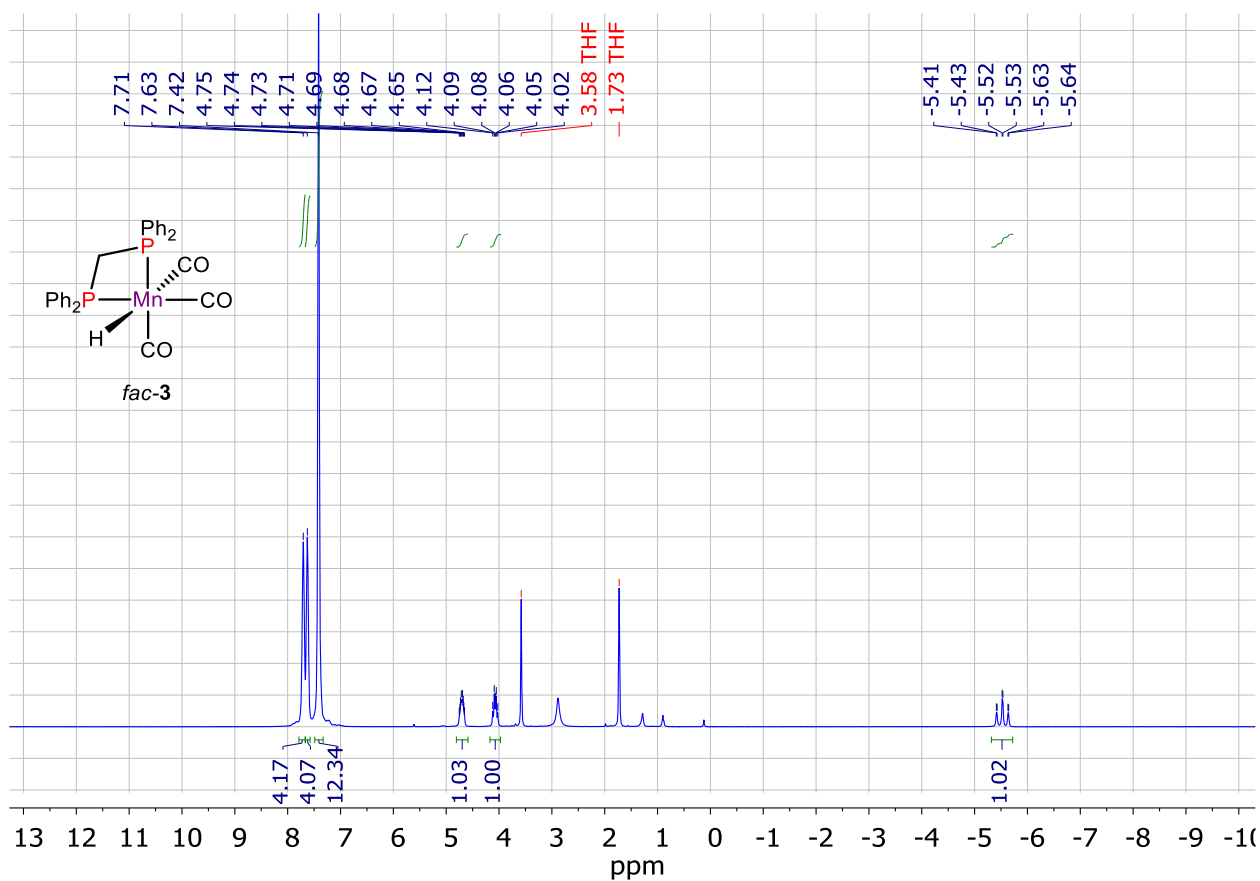

**Figure S14.** <sup>1</sup>H NMR spectrum of complex *fac-3* (400.1 MHz, THF-*d*<sub>8</sub>, 298 K).

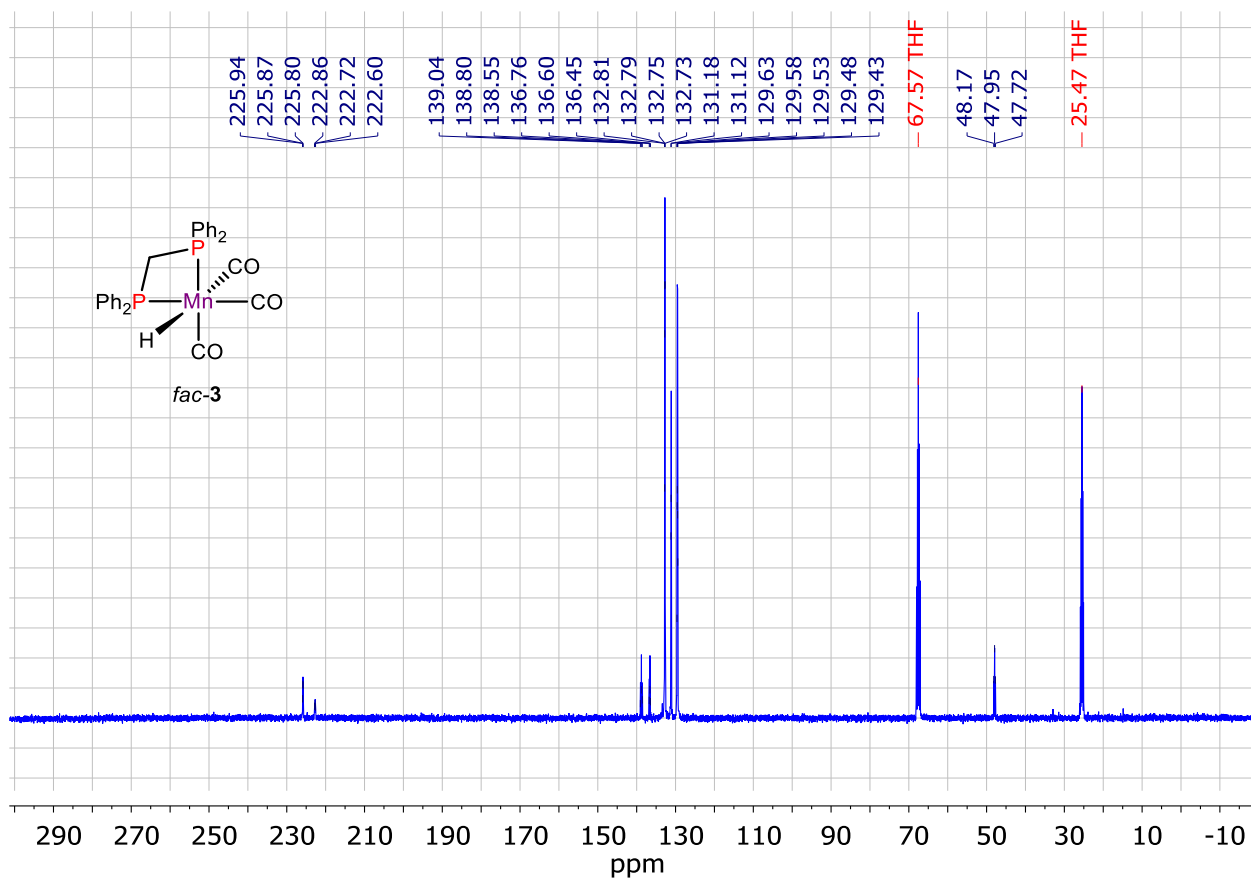

**Figure S15.** <sup>13</sup>C NMR spectrum of complex *fac-3* (150.9 MHz, THF-*d*<sub>8</sub>, 298 K).

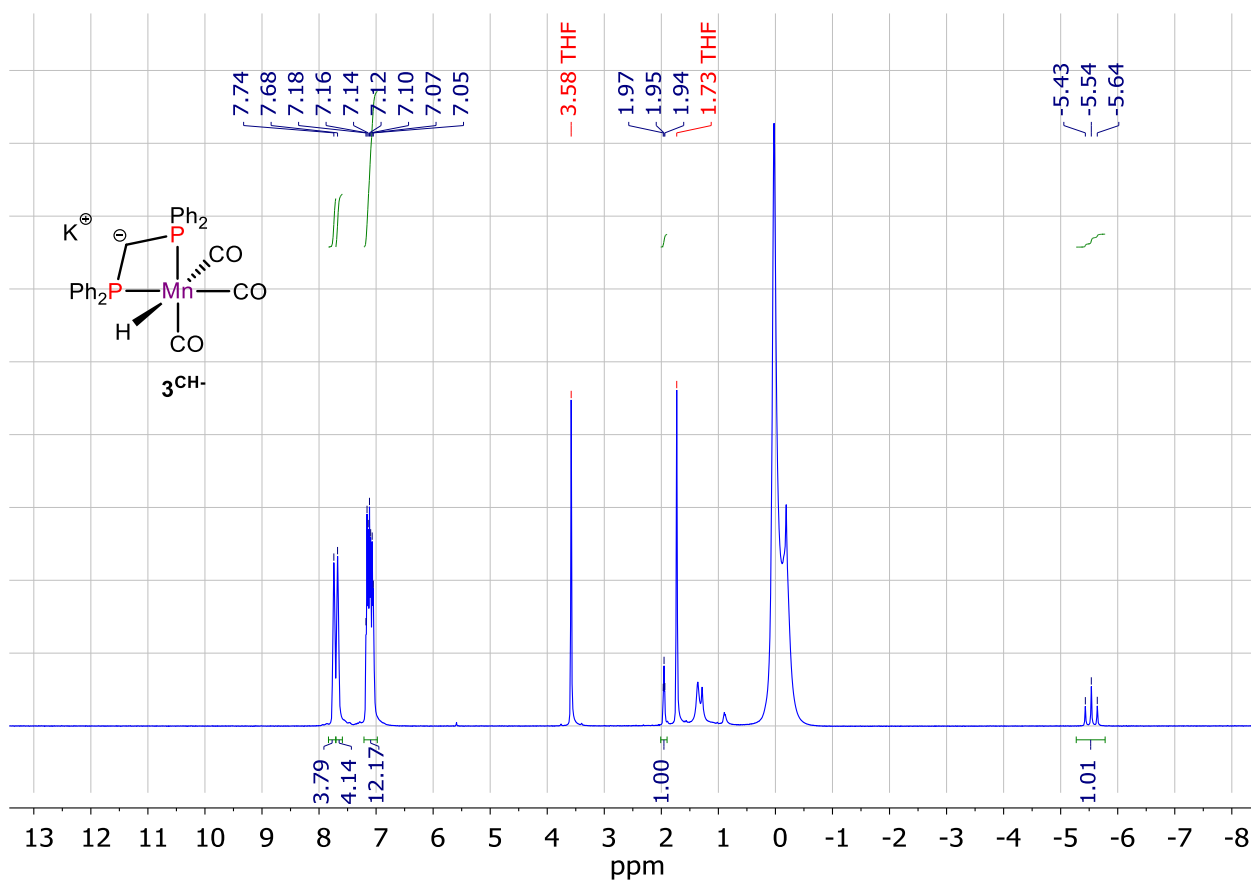

**Figure S16.** <sup>1</sup>H NMR spectrum of complex  $3^{CH-}$  (400.1 MHz, THF-*d*<sub>8</sub>, 243 K).

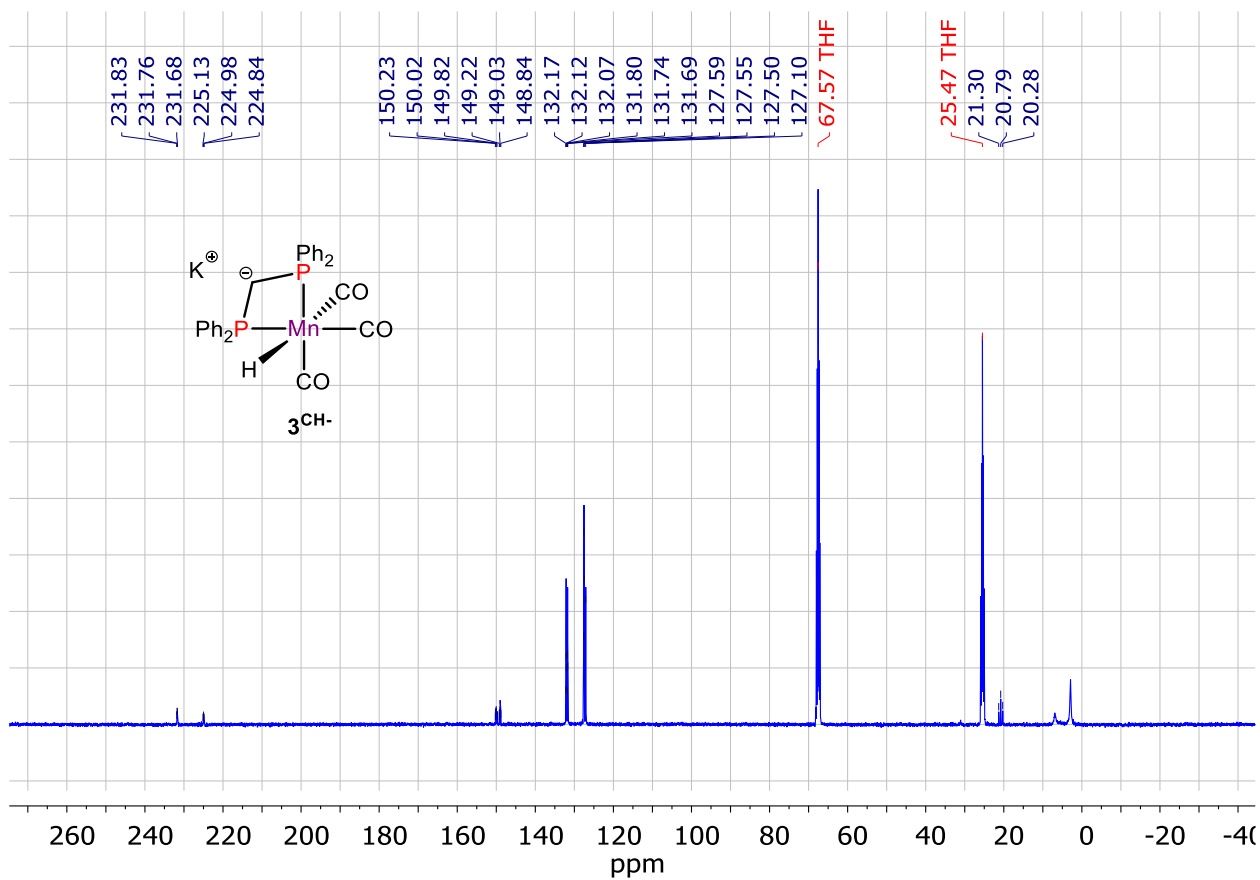

**Figure S17.** <sup>13</sup>C NMR spectrum of complex  $fac-3^{CH-}$  (150.9 MHz, THF-*d*<sub>8</sub>, 243 K).

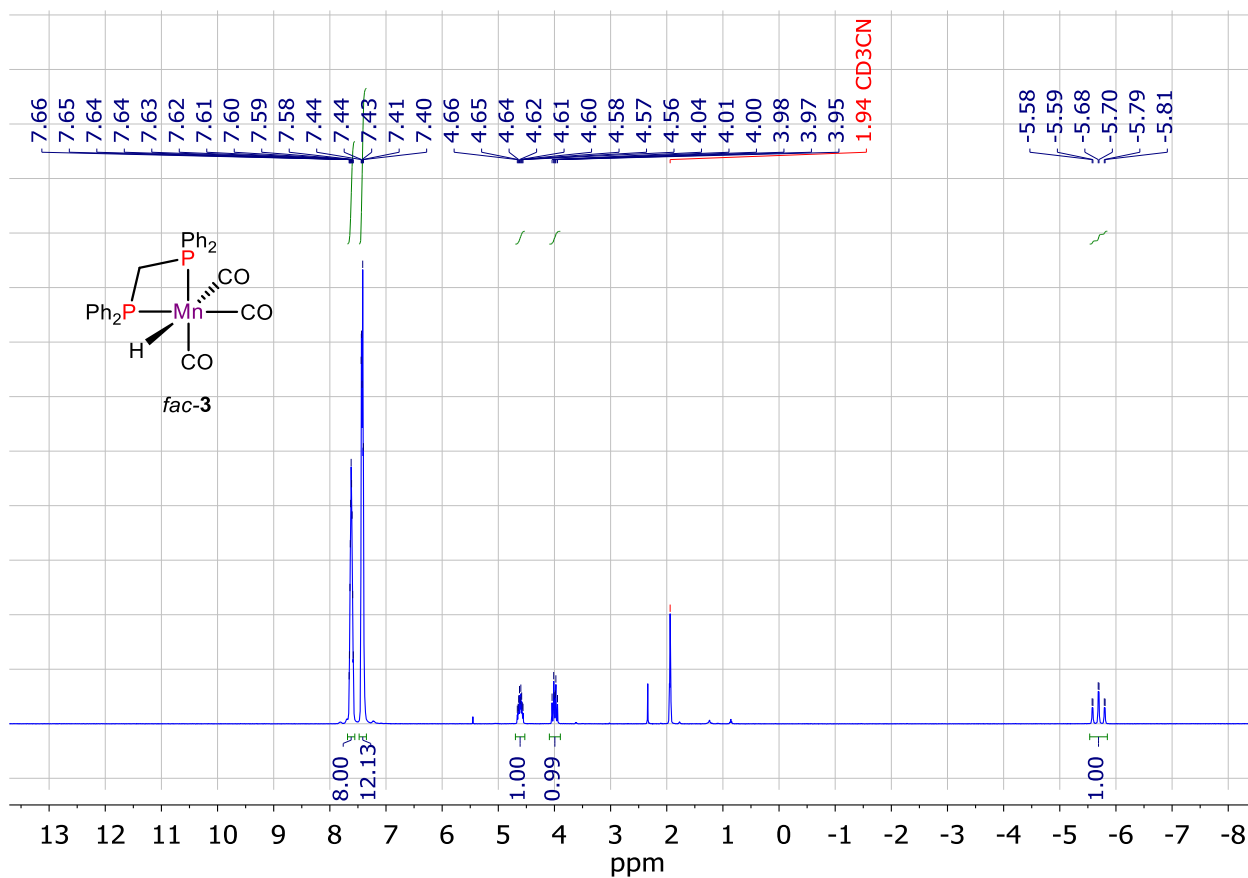

**Figure S18.** <sup>1</sup>H NMR spectrum of complex **3** (400.1 MHz, CD<sub>3</sub>CN, 298 K).

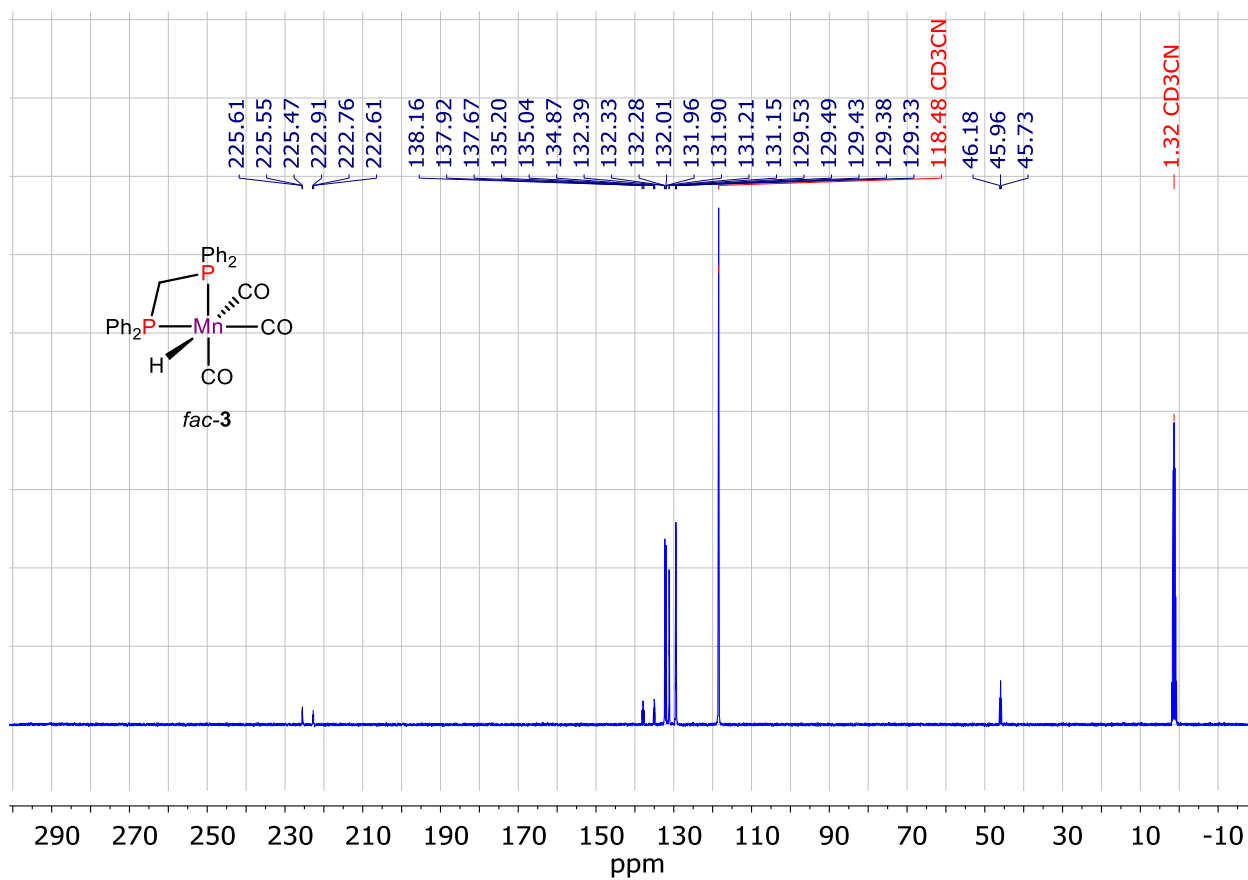

**Figure S19.** <sup>13</sup>C NMR spectrum of complex *fac*-**3** (150.9 MHz, CD<sub>3</sub>CN, 298 K).

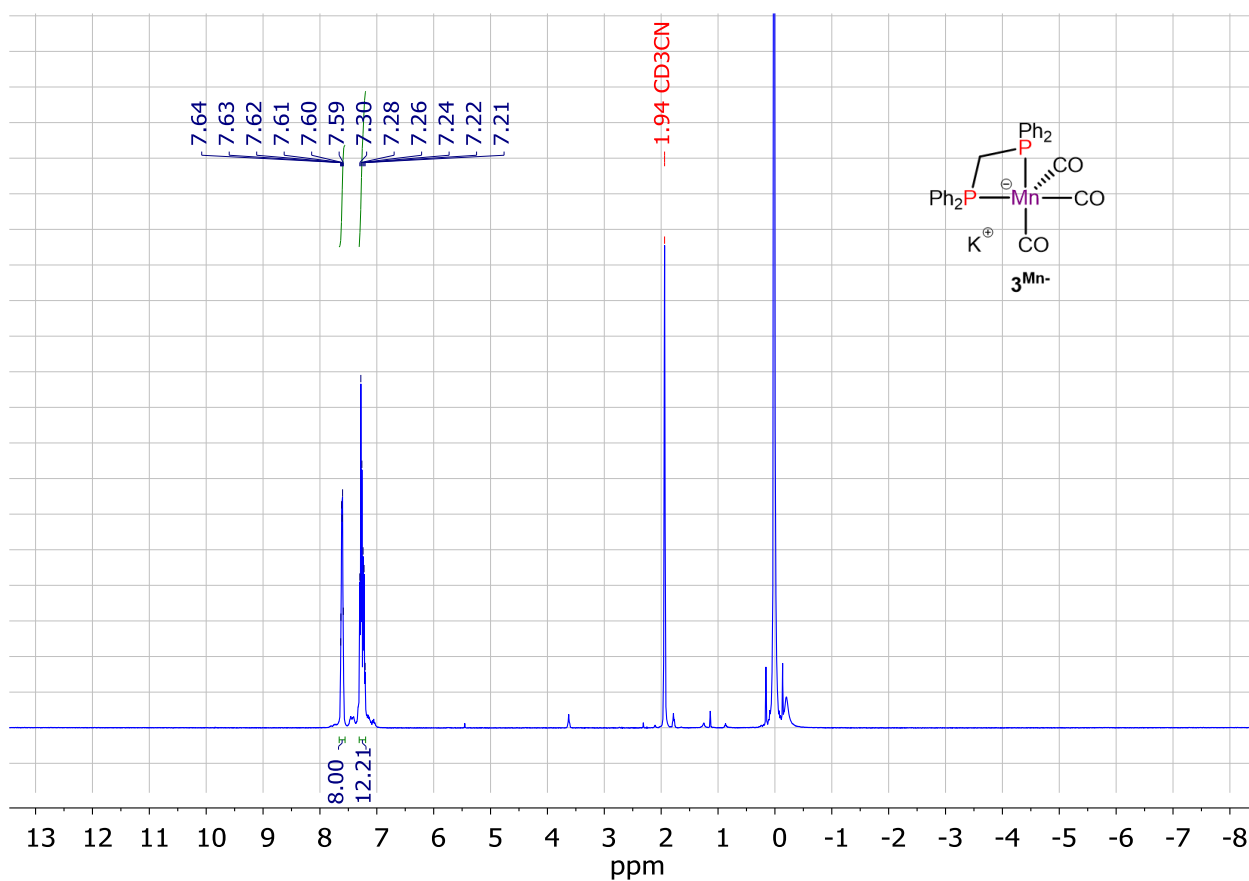

**Figure S20.** <sup>1</sup>H NMR spectrum of complex **3<sup>Mn-</sup>** (400.1 MHz, CD<sub>3</sub>CN, 263 K).

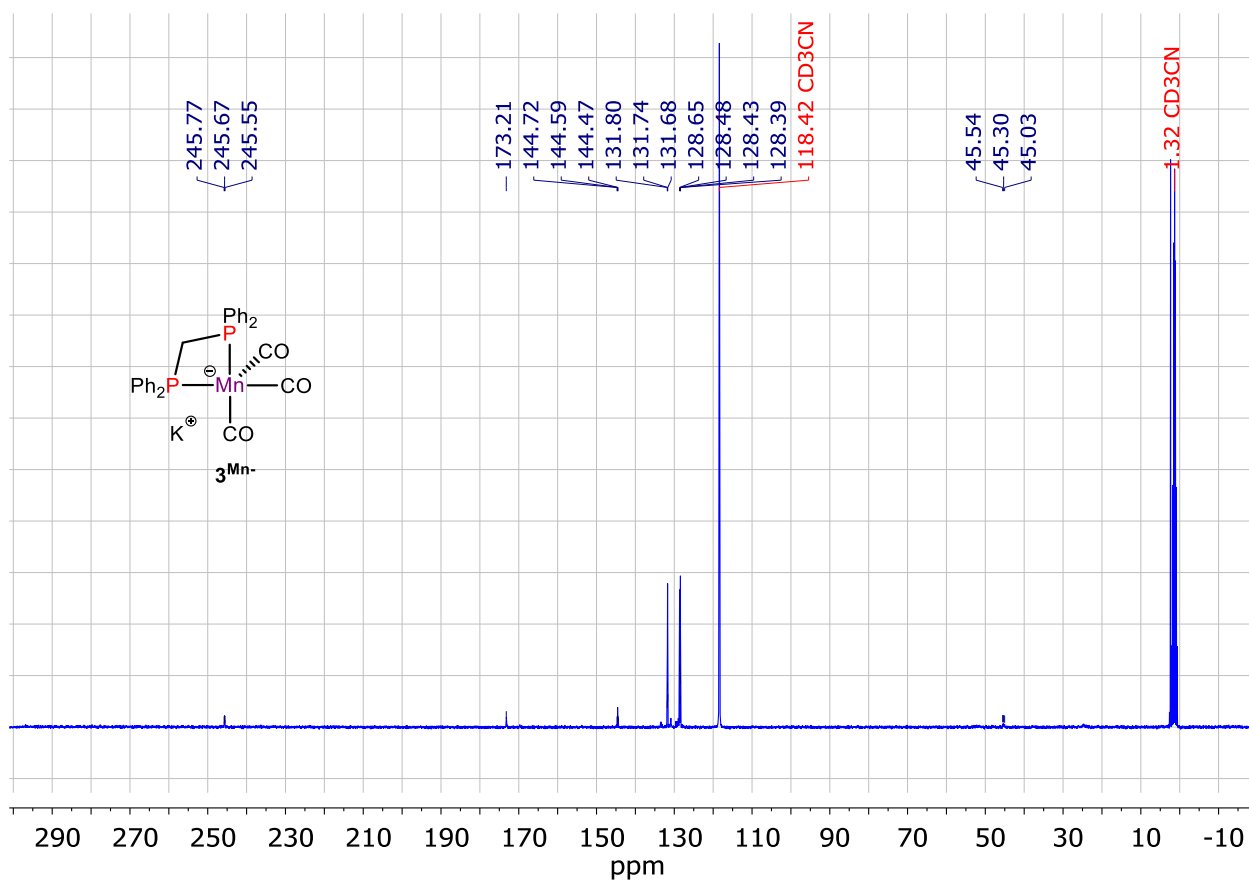

**Figure S21.** <sup>13</sup>C NMR spectrum of complex **3<sup>Mn-</sup>** (150.9 MHz, CD<sub>3</sub>CN, 263 K).



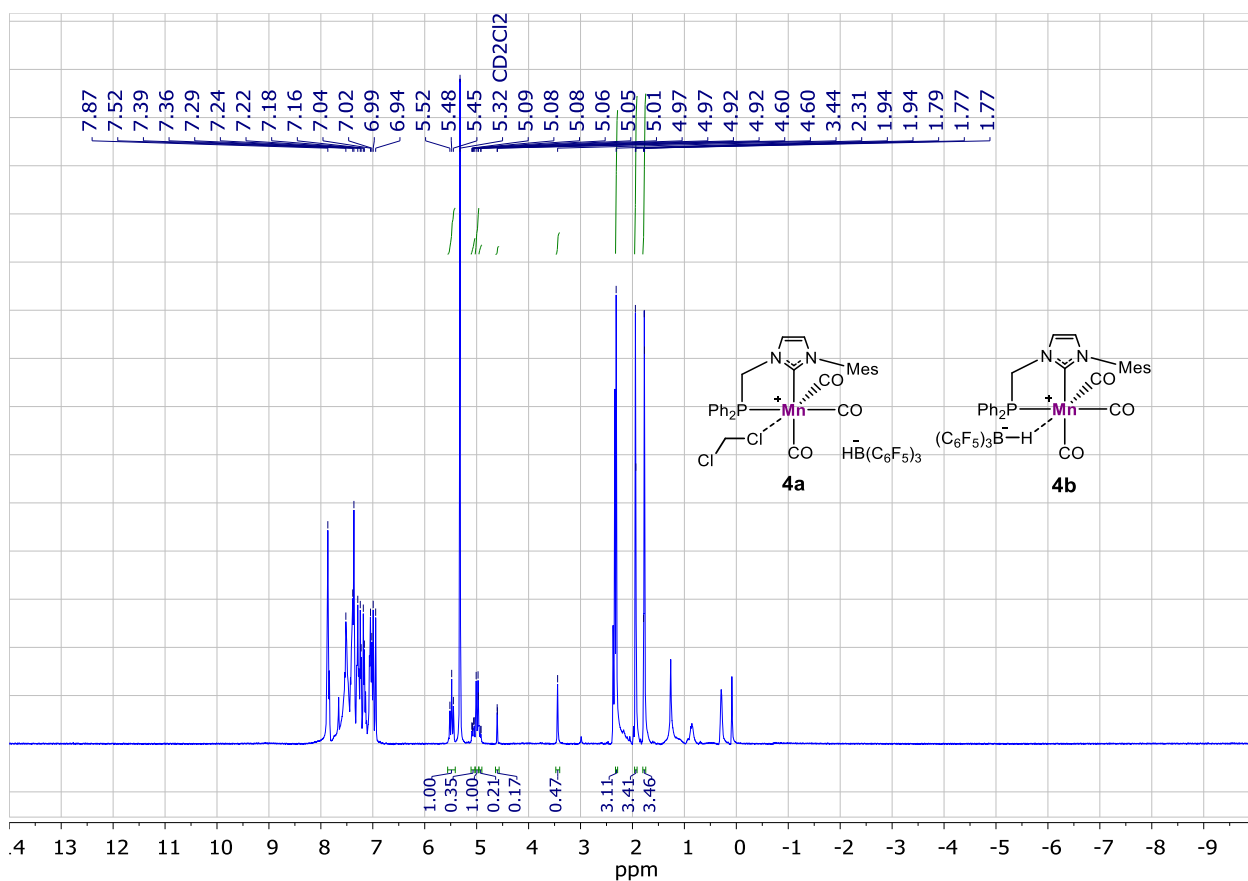

**Figure S22.** <sup>1</sup>H NMR spectrum of mixture *fac*-**4a** and *fac*-**4b** (400.1 MHz, CD<sub>2</sub>Cl<sub>2</sub>, 298 K).

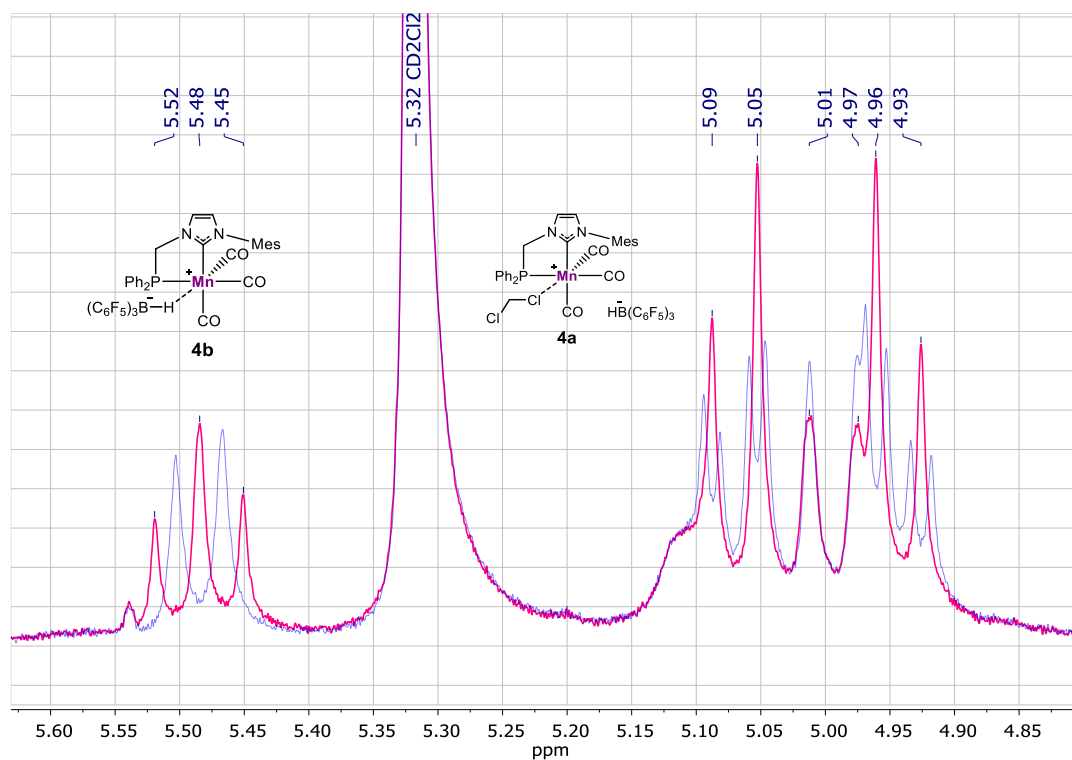

**Figure S23.** <sup>1</sup>H{<sup>31</sup>P} NMR spectra of mixture *fac*-**4a** and *fac*-**4b** with selectively decoupled  $\delta_P$  78.1 ppm (*blue line*) and with selectively decoupled  $\delta_P$  71.1 ppm (*pink line*) (400.1 MHz, CD<sub>2</sub>Cl<sub>2</sub>, 298 K).

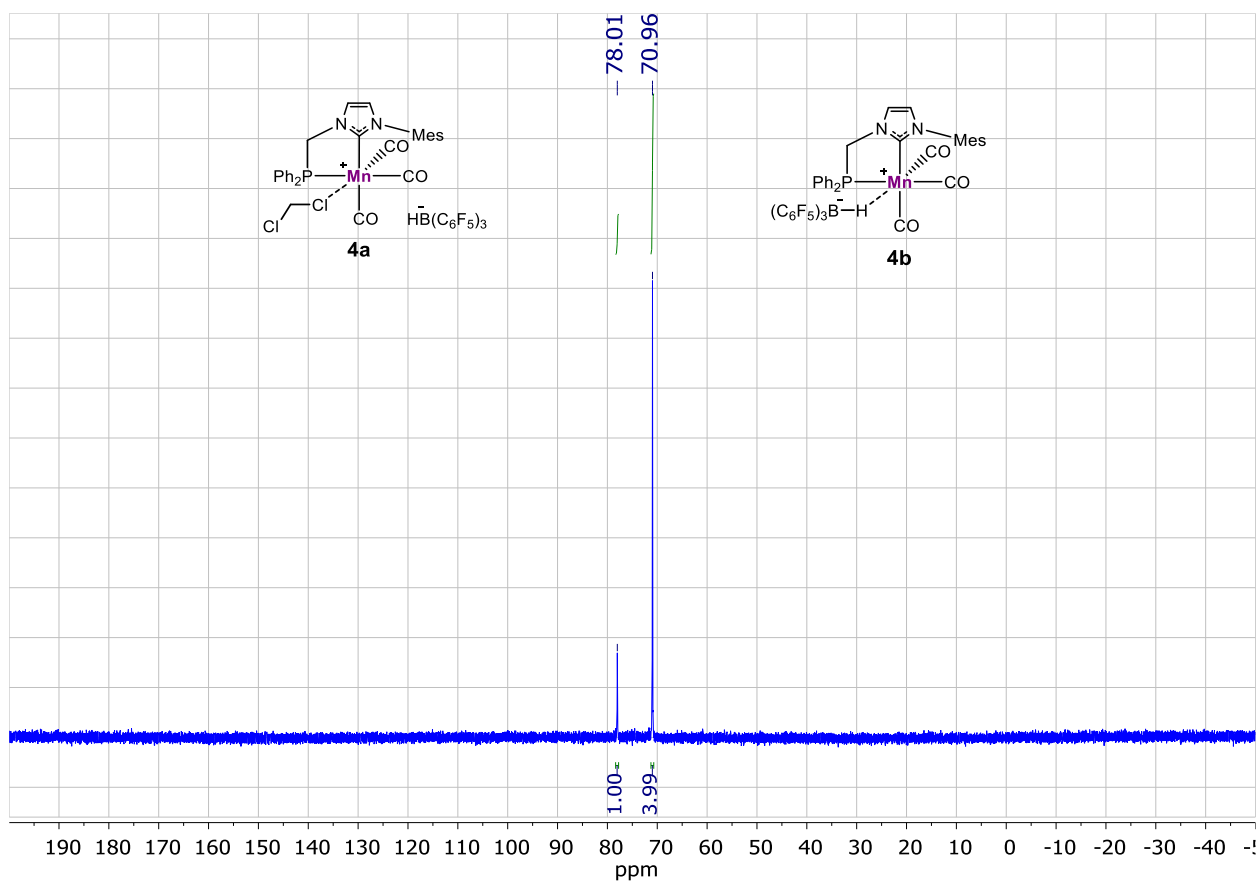

**Figure S24.**  $^{31}\text{P}\{^1\text{H}\}$  NMR spectrum of mixture *fac*-**4a** and *fac*-**4b** (162.0 MHz,  $\text{CD}_2\text{Cl}_2$ , 298 K).

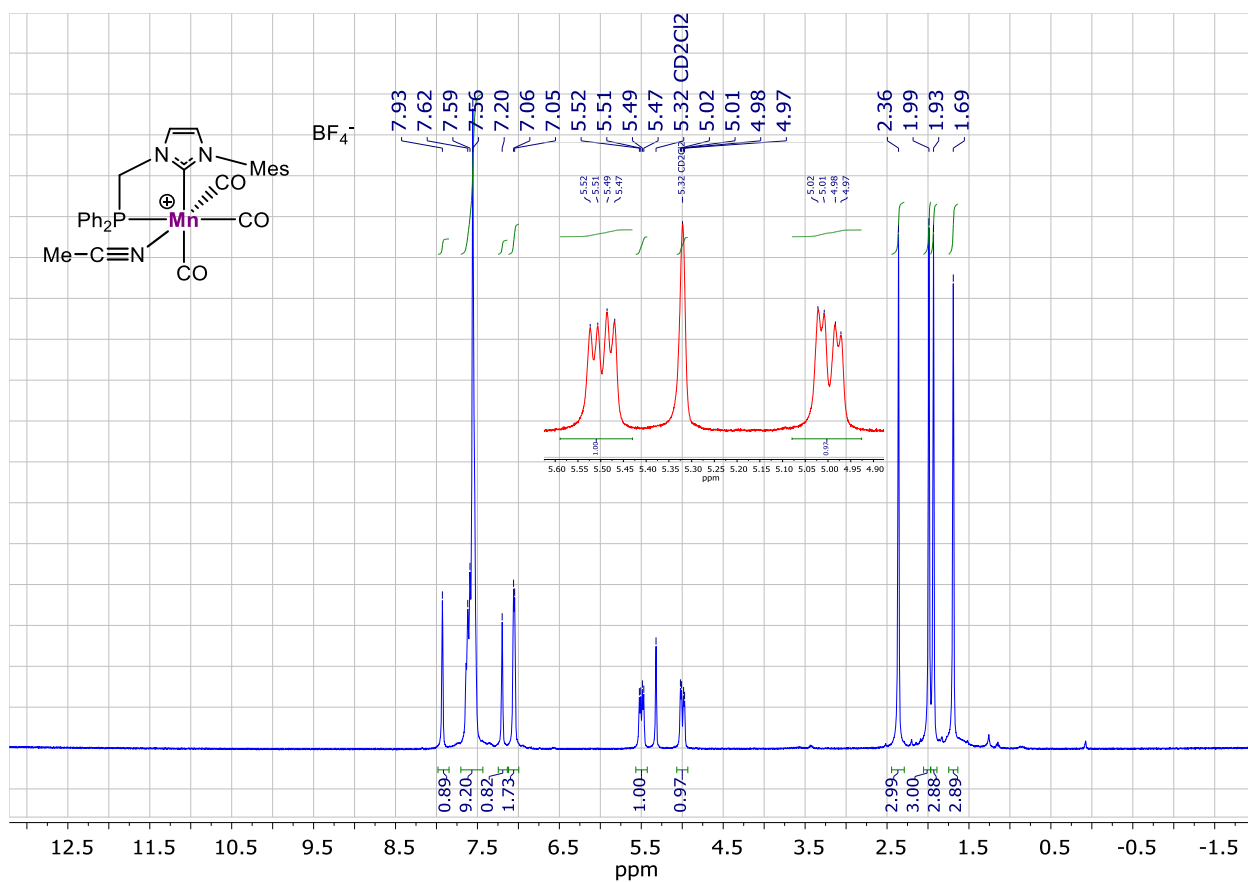

**Figure S25.**  $^1\text{H}$  NMR spectrum of complex **4<sup>MeCN</sup>** (400.1 MHz,  $\text{CD}_2\text{Cl}_2$ , 298 K).

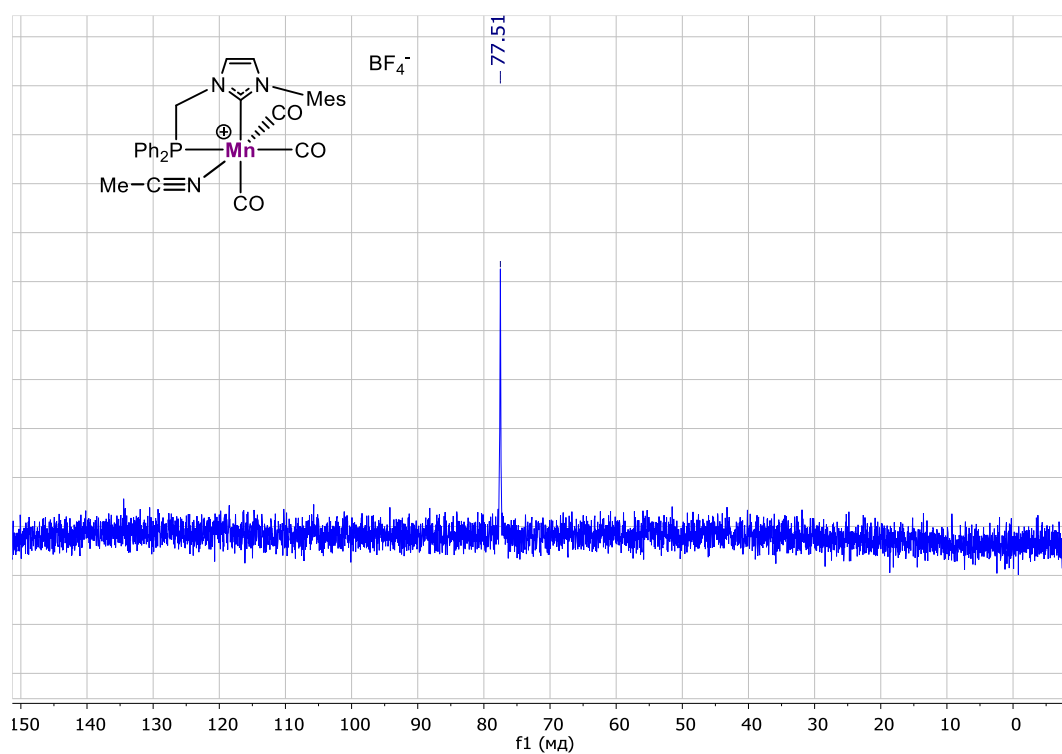

**Figure S26.**  $^{31}\text{P}\{^1\text{H}\}$  NMR spectrum of complex **4**<sup>MeCN</sup> (162.0 MHz,  $\text{C}_6\text{D}_6$ , 298 K).
